# Supplementary material
Source: PubMed Central journal article supplement (PMC8269768)
Supplement: jiaa618_suppl_supplementary_table_1.pdf [file jiaa618_suppl_supplementary_table_1.pdf]

**Supplementary Table 1:** Additional demographic and medical data.

|                                        | <b>Asymptomatic<br/>(N=6)</b> | <b>Symptomatic<br/>Non-Hospitalized<br/>(N=21)</b> | <b>Symptomatic<br/>Hospitalized<br/>(N=5)</b> | <b>Overall<br/>(N=32)</b> |
|----------------------------------------|-------------------------------|----------------------------------------------------|-----------------------------------------------|---------------------------|
| <b>Race</b>                            |                               |                                                    |                                               |                           |
| AIAN                                   | 1 (16.7%)                     | 0 (0%)                                             | 0 (0%)                                        | 1 (3.1%)                  |
| White                                  | 5 (83.3%)                     | 20 (95.2%)                                         | 1 (20.0%)                                     | 26 (81.2%)                |
| Asian                                  | 0 (0%)                        | 1 (4.8%)                                           | 3 (60.0%)                                     | 4 (12.5%)                 |
| Black                                  | 0 (0%)                        | 0 (0%)                                             | 0 (0%)                                        | 0 (0%)                    |
| Multiple Races                         | 0 (0%)                        | 0 (0%)                                             | 1 (20.0%)                                     | 1 (3.1%)                  |
| <b>Hispanic</b>                        | 0 (0%)                        | 1 (4.8%)                                           | 0 (0%)                                        | 1 (3.1%)                  |
| <b>Smoking</b>                         |                               |                                                    |                                               |                           |
| Nonsmoker                              | 5 (83.3%)                     | 19 (90.5%)                                         | 5 (100%)                                      | 29 (90.6%)                |
| Tobacco use                            | 1 (16.7%)                     | 2 (9.5%)                                           | 0 (0%)                                        | 3 (9.4%)                  |
| Electronic cigarettes/vapor<br>pen use | 0 (0%)                        | 1 (4.8%)                                           | 0 (0%)                                        | 1 (3.1%)                  |
| <b>Comorbidities<sup>a</sup></b>       |                               |                                                    |                                               |                           |
| No comorbidities                       | 6 (100%)                      | 19 (90.5%)                                         | 3 (60.0%)                                     | 28 (87.5%)                |
| Asthma                                 | 0 (0%)                        | 0 (0%)                                             | 1 (20.0%)                                     | 1 (2.9%)                  |
| Hypertension                           | 0 (0%)                        | 2 (9.5%)                                           | 1 (20.0%)                                     | 3 (9.4%)                  |
| Diabetes                               | 0 (0%)                        | 0 (0%)                                             | 1 (20.0%)                                     | 1 (3.1%)                  |
| COPD/emphysema                         | 0 (0%)                        | 0 (0%)                                             | 1 (20.0%)                                     | 1 (3.1%)                  |
| Cancer                                 | 0 (0%)                        | 0 (0%)                                             | 1 (20.0%)                                     | 1 (3.1%)                  |
| Obstructive Sleep Apnoea               | 0 (0%)                        | 0 (0%)                                             | 1 (20.0%)                                     | 1 (3.1%)                  |
| <b>Common Symptoms<sup>a</sup></b>     |                               |                                                    |                                               |                           |
| Chills or shivering                    | 0 (0%)                        | 13 (61.9%)                                         | 5 (100%)                                      | 18 (56.2%)                |
| Cough                                  | 0 (0%)                        | 15 (71.4%)                                         | 5 (100%)                                      | 20 (62.5%)                |
| Diarrhea                               | 0 (0%)                        | 6 (28.6%)                                          | 1 (20.0%)                                     | 7 (21.9%)                 |
| Ear pain or ear discharge              | 0 (0%)                        | 0 (0%)                                             | 0 (0%)                                        | 0 (0%)                    |
| Fatigue                                | 0 (0%)                        | 16 (76.2%)                                         | 1 (20.0%)                                     | 17 (53.1%)                |
| Feeling feverish                       | 0 (0%)                        | 13 (61.9%)                                         | 5 (100%)                                      | 18 (56.2%)                |
| Increased trouble<br>breathing         | 0 (0%)                        | 4 (19.0%)                                          | 5 (100%)                                      | 9 (28.1%)                 |

|                                                        |             |             |                   |                   |
|--------------------------------------------------------|-------------|-------------|-------------------|-------------------|
| Loss of sense of taste or smell                        | 0 (0%)      | 7 (33.3%)   | 0 (0%)            | 7 (21.9%)         |
| Muscle or body aches                                   | 0 (0%)      | 13 (61.9%)  | 2 (40.0%)         | 15 (46.9%)        |
| Nausea or vomiting                                     | 0 (0%)      | 3 (14.3%)   | 2 (40.0%)         | 5 (15.6%)         |
| Rash                                                   | 0 (0%)      | 1 (4.8%)    | 0 (0%)            | 1 (3.1%)          |
| Runny or stuffy nose                                   | 0 (0%)      | 12 (57.1%)  | 1 (20.0%)         | 13 (40.6%)        |
| Sore throat or itchy/scratchy throat                   | 0 (0%)      | 9 (42.9%)   | 0 (0%)            | 9 (28.1%)         |
| Sweats                                                 | 0 (0%)      | 13 (61.9%)  | 4 (80.0%)         | 17 (53.1%)        |
| <b>Highest Level of Medical Treatment Received</b>     |             |             |                   |                   |
| Outpatient - Testing Only                              | 5 (83.3%)   | 13 (61.9%)  | 0 (0%)            | 18 (56.2%)        |
| Outpatient - Saw Provider <sup>b</sup>                 | 1 (16.7%)   | 8 (38.1%)   | 0 (0%)            | 9 (28.1%)         |
| Inpatient (General Floor)                              | 0 (0%)      | 0 (0%)      | 2 (40.0%)         | 2 (6.2%)          |
| Inpatient (ICU)                                        | 0 (0%)      | 0 (0%)      | 3 (60.0%)         | 3 (9.4%)          |
| <b>Highest Level of Respiratory Support</b>            |             |             |                   |                   |
| None                                                   | 6 (100%)    | 21 (100%)   | 0 (0%)            | 29 (85.3%)        |
| Nasal Cannula                                          | 0 (0%)      | 0 (0%)      | 1 (20.0%)         | 1 (2.9%)          |
| High-flow O2 or non-rebreather                         | 0 (0%)      | 0 (0%)      | 1 (20.0%)         | 1 (2.9%)          |
| Non-invasive ventilation (BiPAP)                       | 0 (0%)      | 0 (0%)      | 1 (20.0%)         | 1 (2.9%)          |
| Mechanical Ventilation                                 | 0 (0%)      | 0 (0%)      | 2 (40.0%)         | 2 (5.9%)          |
| <b>Duration of mechanical ventilation (days) (N=2)</b> |             |             |                   |                   |
| Median [Min, Max]                                      | NA [NA, NA] | NA [NA, NA] | 11.5 [6.00, 17.0] | 11.5 [6.00, 17.0] |

<sup>a</sup>Categories not mutually exclusive

<sup>b</sup>Includes Primary care physician, Urgent care, Emergency Department
